# Supplementary material
Source: PubMed Central journal article supplement (PMC8663645)
Supplement: NIHMS1647254-supplement-1.pdf [file NIHMS1647254-supplement-1.pdf]

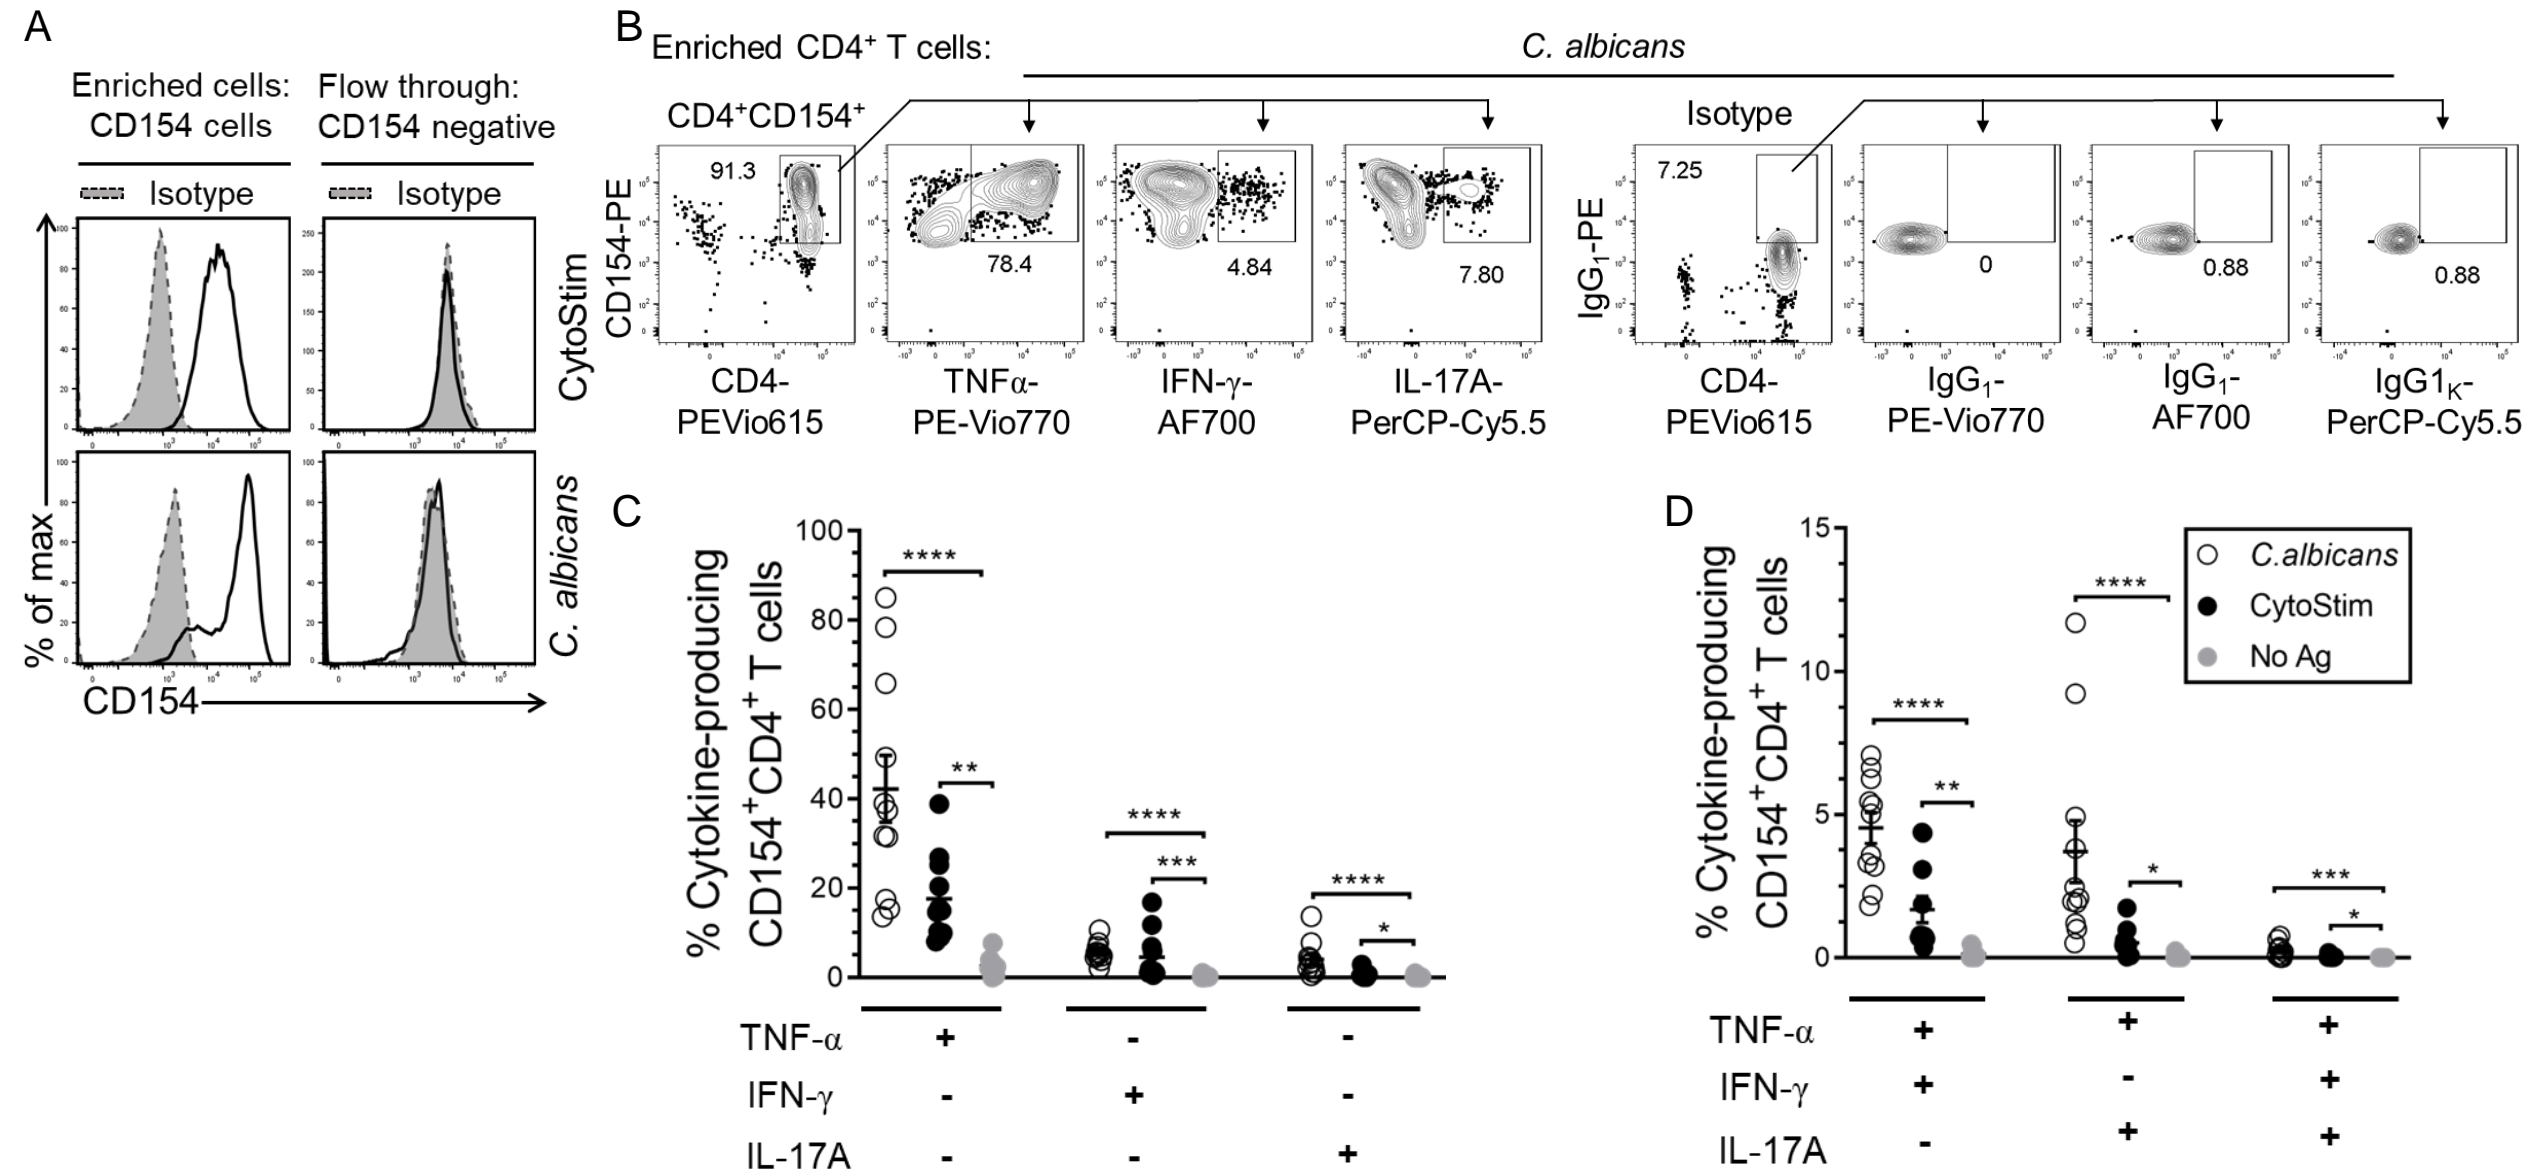

**Figure S1. Detection of CD154 and cytokine expression using the CD154<sup>+</sup> enrichment assay. (A)** Histogram representation of intracellular CD154 expression on enriched and flow through cells with isotype control 7h post-stimulation with CytoStim and *C. albicans*. **(B)** Contour plots representing TNF- $\alpha$ , IL-17A and IFN- $\gamma$  producing cells among by *C. albicans*-exposed cells with (CD154 and cytokine) isotype control. **(C)** Frequency of CytoStim-stimulated or *C. albicans*-exposed CD154<sup>+</sup>CD4<sup>+</sup> T cells secreting IFN- $\gamma$ , IL-17A and TNF- $\alpha$  among Crohn's patients (n = 10). **(D)** Frequency of CytoStim-stimulated or *C. albicans*-exposed TNF- $\alpha$ <sup>+</sup>IL-17A<sup>+</sup> and TNF- $\alpha$ <sup>+</sup>IFN- $\gamma$ <sup>+</sup> double positive CD154<sup>+</sup>CD4<sup>+</sup> T cells among Crohn's patients (n = 10). Bars represent the means  $\pm$  SEM of ten independent experiments; one-way ANOVA with Dunn's multiple comparison. \*p<0.05, \*\*p<0.01, \*\*\*p<0.001, \*\*\*\*p<0.000.

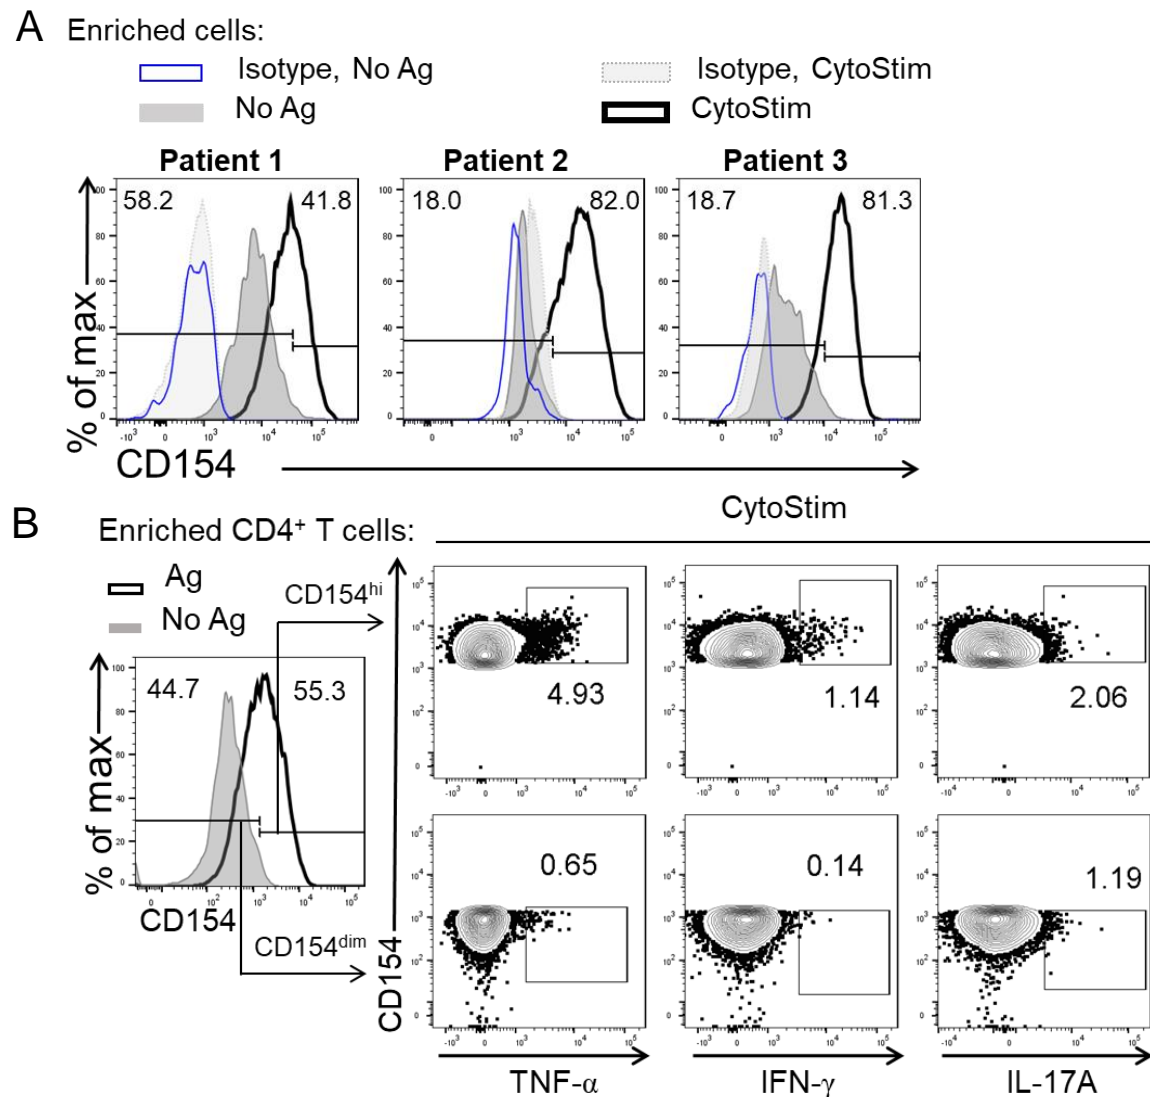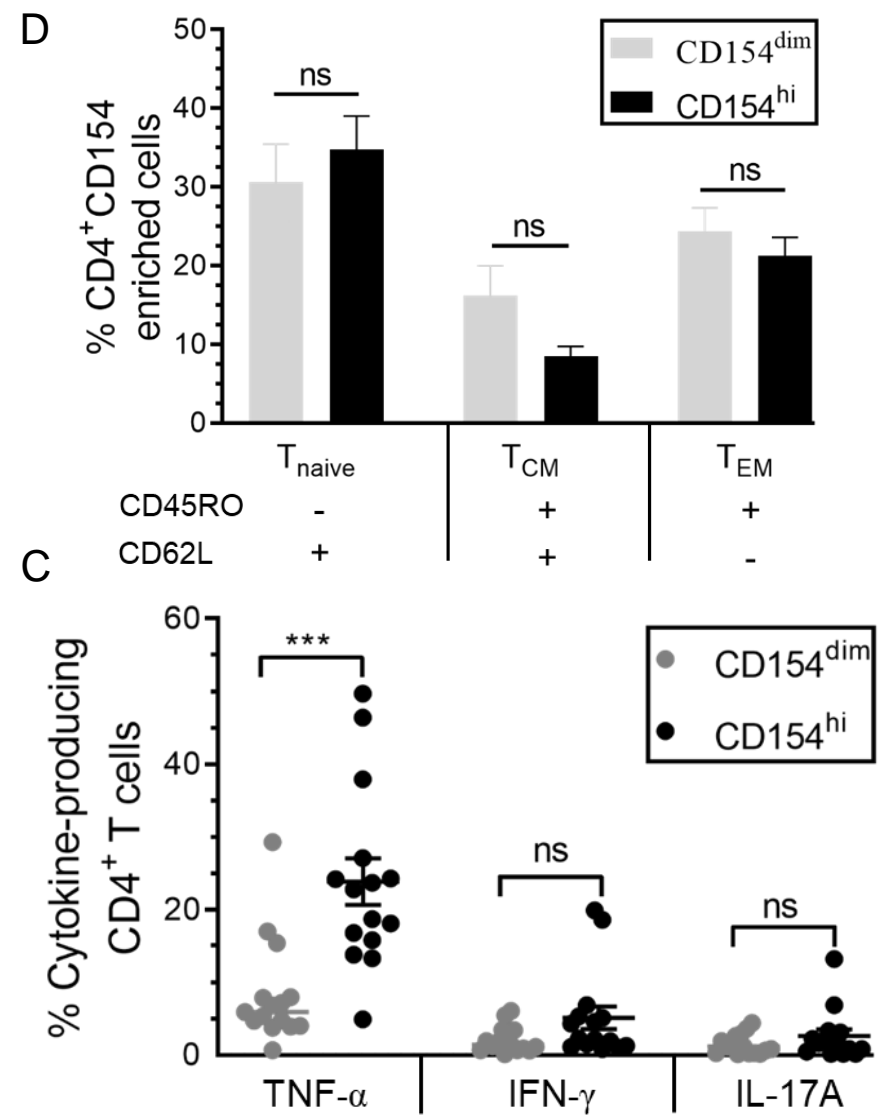

**Figure S2. CD154 expression and cytokine production by CytoStim-stimulated CD4<sup>+</sup> T lymphocytes.** (A) CD4<sup>+</sup> T lymphocyte responses to CytoStim in Crohn's patients (n = 3). Histogram overlays are shown with the CD154 isotype control for CytoStim-simulated cells (grey dotted line) and unstimulated cells (blue solid line). CD154 expression for unstimulated cells (dark grey solid line) and CytoStim-stimulated cells (black solid lines). (B) Representative flow plots for cytokine production by CytoStim stimulated CD4<sup>+</sup>CD154<sup>dim/hi</sup> cells. Histogram overlay plots are shown with unstimulated cells (dark grey solid lines) and CytoStim-stimulated cells (the solid line). (C) The frequency of TNF- $\alpha$ , IFN- $\gamma$ , IL-17A produced by CD154<sup>dim/hi</sup>CD4<sup>+</sup> T cells following CytoStim stimulation among Crohn's patients (n = 15). Bars represent the means  $\pm$  SEM of fifteen independent experiments; Mann Whitney test. \*\*\*p<0.001, ns, not statistically significant. (D) The percentage of CD62L and CD45RO expression by CytoStim-stimulated CD154<sup>dim/hi</sup>CD4<sup>+</sup> T cells among Crohn's patients (n = 8). Bars represent the means  $\pm$  SEM of eight independent experiments; two-way ANOVA Dunnett's multiple comparison tests. ns, not statistically significant.

A

CD69 expression on CD154<sup>+</sup>CD4<sup>+</sup> T cells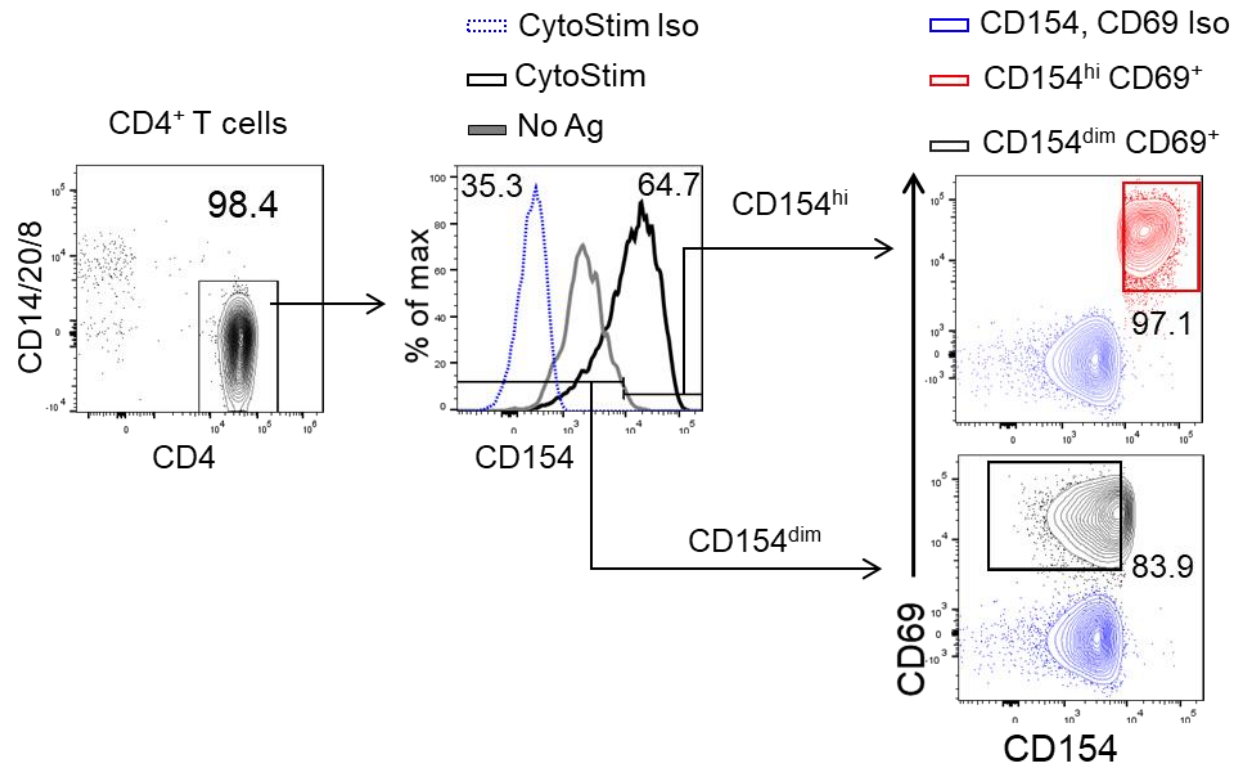

B

Cytokine production by CD69<sup>+</sup>CD4<sup>+</sup> CD154 enriched cells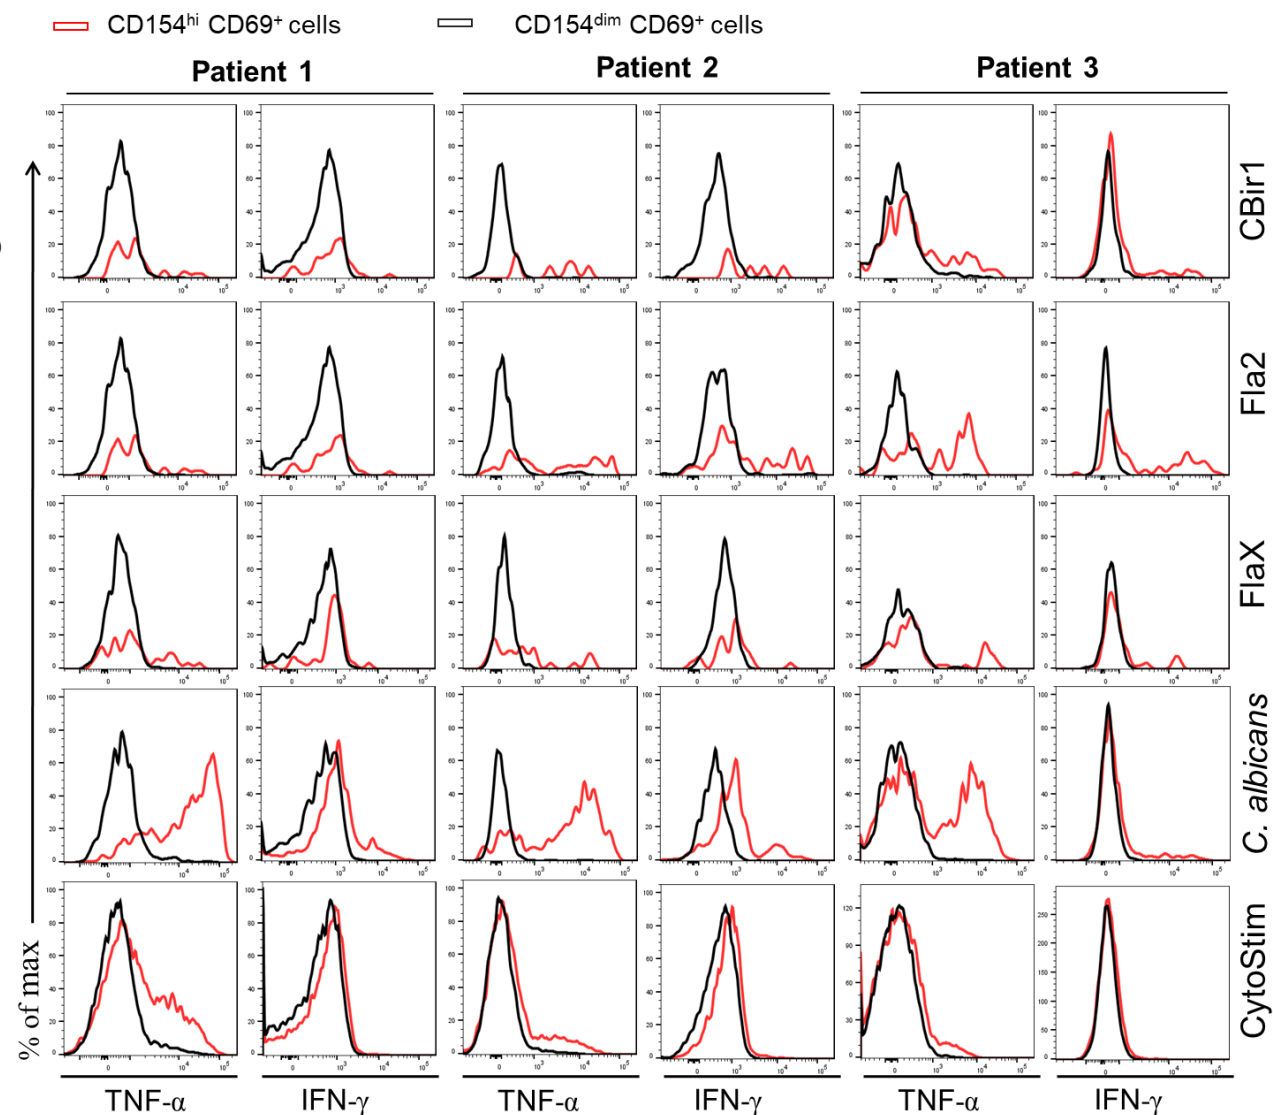

**Figure S3. Co-expression of activation markers CD69 and CD154 on PBMC 7h post-stimulation. (A) Flow cytometry analysis of PBMCs from one representative active Crohn's patient.** Gated on live, CD14<sup>-</sup>, CD20<sup>-</sup>, CD8<sup>-</sup>, CD4<sup>+</sup> cells followed by histogram overlays of CytoStim-stimulated (black solid line) and antigen unexposed (grey solid line) and CD154 isotype control for CytoStim-stimulated (blue dotted line) cells. Contour plot overlays for CD154 and CD69 expression by CD154<sup>hi/dim</sup>CD4<sup>+</sup> T cells with CD154 and CD69 isotype control (blue solid line). Histogram overlays of TNF- $\alpha$  and IFN- $\gamma$  produce by CytoStim-stimulated CD69<sup>+</sup>CD154<sup>hi/dim</sup>CD4<sup>+</sup> T cells. **(B) Histogram overlay of antigen-exposed TNF- $\alpha$ <sup>+</sup> and IFN- $\gamma$ <sup>+</sup> CD69<sup>+</sup>CD154<sup>hi</sup>CD4<sup>+</sup> and CD69<sup>+</sup>CD154<sup>dim</sup>CD4<sup>+</sup> T cells from 3 independent active Crohn's patients.**

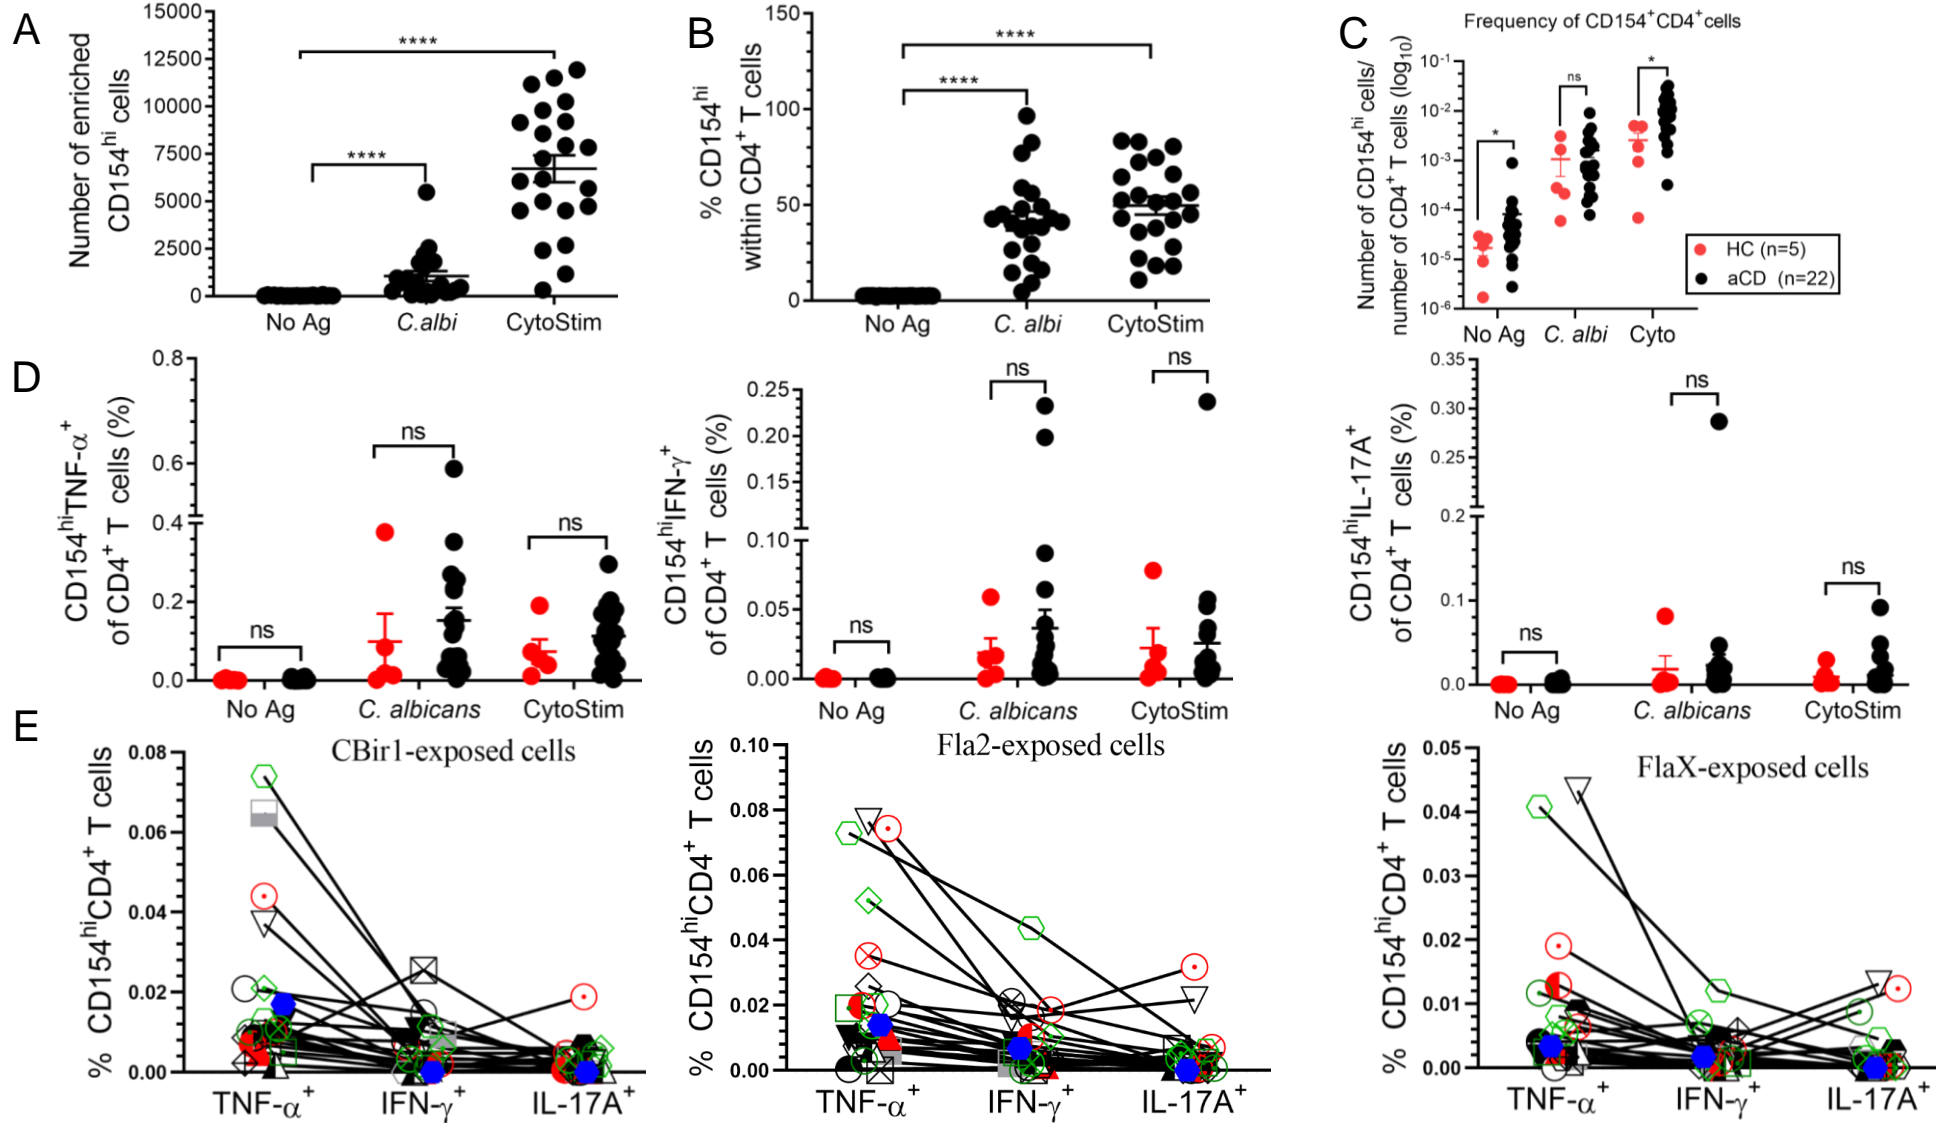

**Figure S4. CD4<sup>+</sup> T cell responses following antigen exposure, or polyclonal stimulation.** (A) Number of *C. albicans*-, CytoStim-stimulated, or antigen unexposed enriched CD154<sup>hi</sup> cells in active CD (aCD) patients (n = 22). (B) Percentage of CD154<sup>hi</sup> cells among CD4<sup>+</sup> T cells from active Crohn's (n = 22) following *C. albicans* or CytoStim stimulation. (C) Frequencies of *C. albicans* and CytoStim-stimulated CD154<sup>+</sup>CD4<sup>+</sup> T cells among active Crohn's (n = 22) and healthy (n = 5) patients were calculated from the total number of CD154<sup>+</sup> cells obtained after enrichment normalized to the total number of CD4<sup>+</sup> cells applied on the column. (D) Frequency of cytokine production by CD154<sup>+</sup>CD4<sup>+</sup> T cells. The frequency of TNF- $\alpha$ , IFN- $\gamma$  and IL-17A producing *C. albicans* and CytoStim-stimulated T cells among active Crohn's (black dots; n = 22) and non-IBD healthy (red dots; n = 5) patients were calculated from the total number of cytokine positive cells normalized to the total number of CD154<sup>+</sup> cells obtained after enrichment. Bars represent the means  $\pm$  SEM of five-twenty-two independent experiments; Mann Whitney test. \*\*p<0.01 \*\*\*p<0.001, \*\*\*\*p<0.0001, ns not significant. (E) Comparison of CD154<sup>+</sup>CD4<sup>+</sup> T cells cytokine reactivity to different flagellin antigens within the same aCD patient. Each symbol represents an active CD patient (lines link result within same patient).
